# Supplementary material
Source: PubMed Central journal article supplement (PMC9045880)
Supplement: mmc1.pdf [file mmc1.pdf]

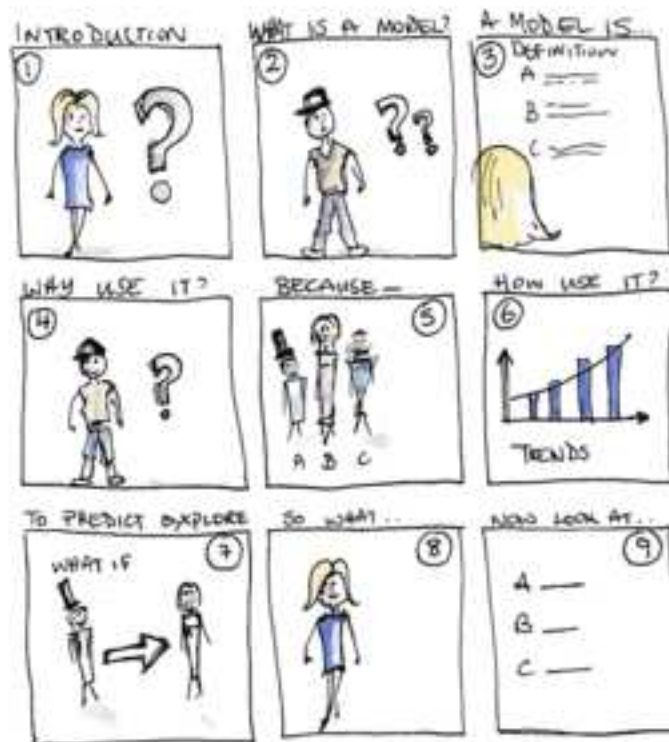

Keep the flow of the different parts of the explainer have a similar colourmap throughout.

### Focus on one question "Why model"?

This is a quick/short explainer video.

Use cartoon characters. Have different ones; choose them to be suitable/friendly etc..

- A/ ① Introduction and simple questions and definitions ②, ③
- B/ ④ Go onto why use it.. give reasons ⑤ and ⑥ and more detail ⑦
- C/ Now give topic suggestions of what to do now. And what to look at.

### COVID EXPLAINER VIDEO

SHEET 5

NOVEMBER 2020. JCR

- ① Introduction to the topic. Jump straight into the question "Why models"?
- ② Question of other character over "What is a model."
- ③ Definition given. Loop to back of character's head. Explaining the topic.
- ④ Back to the other character - of quantity why use it.
- ⑤ Give example, with some characters mixing and moving around.
- ⑥ Give more diagrams over explanation to help confirm the idea.
- ⑦ Then go to exploring and predicting the scenario.
- ⑧ Now what to do. Give some <sup>suggestions</sup> ~~hints~~ at what to do now.
- ⑨ Finish and now end the explainer.

### Detail:

- + Need to create the characters & rig them
- + Need to define the narrative to make it clear. write the story
- + Look to create the other assets backgrounds, images etc.
- + Look at the colours & choose a suitable colourmap/palette.
- + Look at the flow of the story and try out the video draft on people for their reaction.
- + improve and change as appropriate.





News interview style

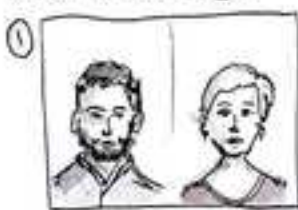

News presenter & expert

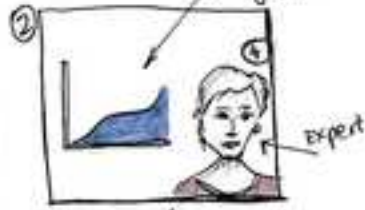

Discuss different aspects of models

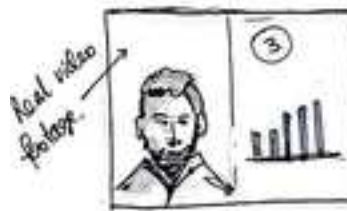

look at an example of the rising quantity of cases.

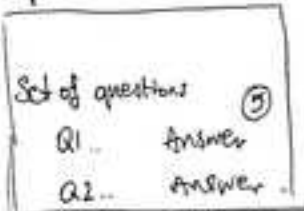

- ⑥ Keep to the main questions = make sure answers clear
- ⑦ Keep it fun & enjoyable.

News style interview

Run through questions; answers interspersed with graphics. One presenter asks questions of the other.

Q What is a model

Q. What does it advise?

Q. How is it used?

Q. Why are different models useful & used?

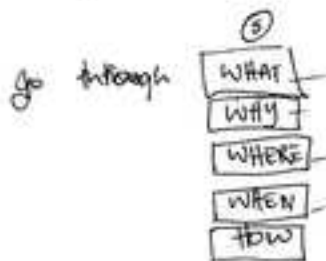

COVID EXPLAINER VIDEO

SHEET 2

NOVEMBER 2020 JLR

- ① Introduction: introducing the people
- ② Straight into models: what they are → use an example
- ③ use diagrams and pictures to explain the facts. Graphics to help explain
- ④ Swap between presenters.
- ⑤ use what, why, where, when and how as a structure for the questions
- ⑥ Keep the questions short & make sure the answers are short and clear.
- ⑦ cut to other graphics; maybe have a quick joke at the start to make it enjoyable

+ Interview style is familiar to the public - they get this style in the news

+ The questions follows a standard approach - the 5 W's.

+ People know what is happening next.

- It may be too long with the 5 W's question

- There may be interview fatigue with the public fed-up with this approach/and the style.

- Unclear what graphics would help may need to focus on the words of the expert more.

- May end up being long and not so interesting & difficult to capture people's imagination.

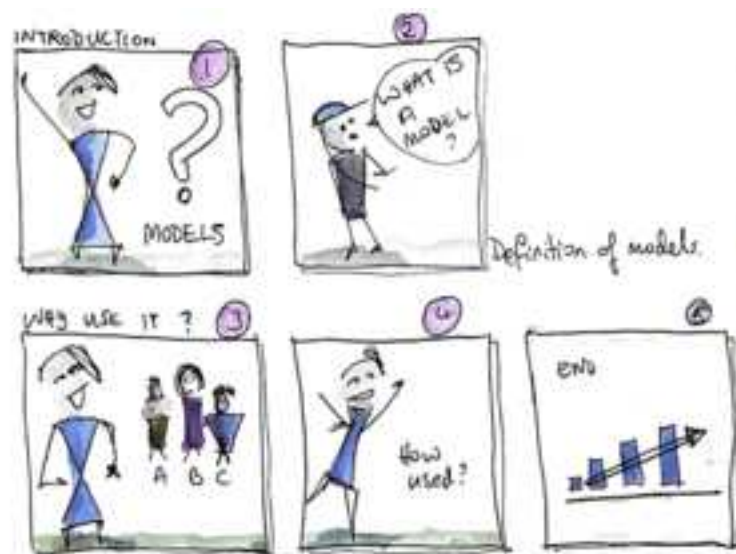

Why? Definition & explanation of using it with examples of people: if A has it and B goes close -

Predictions of different scenarios and helping people to understand it better.

Look at trends over time.

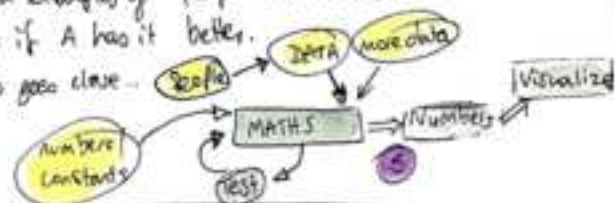

## COVID EXPLAINER VIDEO

### SHEET 3

NOVEMBER 2020 JR

- ① Introduction to the topic. focusing on one question "Why" use maths..?
- ② Explanation of a model. A confused character.
- ③ Going back to the happy character have an explanation of its use with different people
- ④ Now turning to its use. Explanation of its use. Could have graphic of getting data from people and putting into math model. Output numbers, visualize numbers.
- ⑤

Focus on one question: the why.  
make it short, use cartoon characters.  
(A quick explainer sandwich)

- ① Introduction
- ② what is a model? Definition
- ③ Why use it?
- ④ How used?
- ⑤ END.

- + Cartoon style can be fun
- + clear and short story to keep people's attention.
- + Definition given to explain some of the wording
- + good for a wide variety of audiences.
- Non scientific approach may not be suitable for everyone
- would not go into detail and may be information that people know already
- Some people may not take the cartoon style seriously.

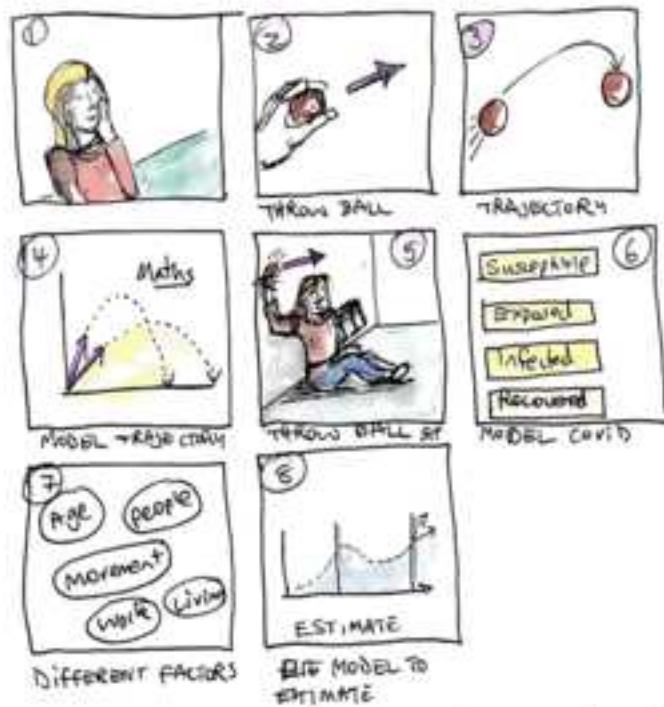

metaphor story - with cartoon feel. Give example such as modeling when a ball would fall from a thrower by standing up - then by sitting down. Move to covid model

## Metaphor idea

Go through different metaphors. For example throwing a ball from standing up, and then sitting. Maths can calculate where the ball lands. But weather, wind direction, position of thrower all have effect on the ball.

- ⇒ use metaphor
- ⇒ give example by using metaphor
- ⇒ Turn to covid and explain (simple term) the idea of models used by scientists in covid.
- ⇒ use simple graphics

## COVID EXPLAINER VIDEO

### SHEET 4

NOVEMBER 2020 JCR

- 1 Person standing up. Thinking about models
- 2 Using metaphor of ball throwing. Show a character throwing a ball.
- 3 Show where the ball lands.
- 4 Show the trajectory equation and explain that maths will calculate the ideal ball and where it will land.
- 5 But there are many complexities. Eg. sitting down & throwing will be different to standing. Weather conditions. Type of ball, and so on
- 6 Introduce a simple model for covid
- 7 Explain some of the complexities of covid modelling
- 8 Explain some of its uses and how it can help predict cases.

- + simple idea - gets the point over about complexities of covid modelling
- + works well as people usually understand how to throw a ball
- some parts are simple/other parts are complex (eg. the model of covid) so would need careful attention to the complex part of the story to not make it too complex.
- character needs to be lovable & trustworthy.
- people may not understand the metaphor or turn away when the maths part is explained so keep simple.
